# Supplementary material for: Plet1 is an epigenetically regulated cell surface protein that provides essential cues to direct trophoblast stem cell differentiation
Source: PubMed Central journal article supplement (PMC4848516; doi:10.1038/srep25112), 2016-04-28
Supplement: srep25112-s1.pdf [file srep25112-s1.pdf]

## Supplementary Information

### **Plet1 is an epigenetically regulated cell surface protein that provides essential cues to direct trophoblast stem cell differentiation**

Alexander Murray<sup>1,2</sup>, Arnold R. Sienerth<sup>1</sup> and Myriam Hemberger<sup>1,2,\*</sup>

**1** Epigenetics Programme, The Babraham Institute, Babraham Research Campus,  
Cambridge CB22 3AT, UK

**2** Centre for Trophoblast Research, University of Cambridge, Downing Street,  
Cambridge CB2 3EG, UK

\* corresponding author

Dr. Myriam Hemberger  
Epigenetics Programme  
The Babraham Institute  
Babraham Research Campus  
Cambridge CB22 3AT  
United Kingdom  
Tel: +44 (0)1223 496 534  
Fax: +44 (0)1223 496 034  
Email: [myriam.hemberger@babraham.ac.uk](mailto:myriam.hemberger@babraham.ac.uk)

Running head: Plet1 levels modulate TSC fate

Keywords: Trophoblast stem cells, lineage gatekeeper, DNA methylation, epigenetics, self-renewal, control of differentiation

**a**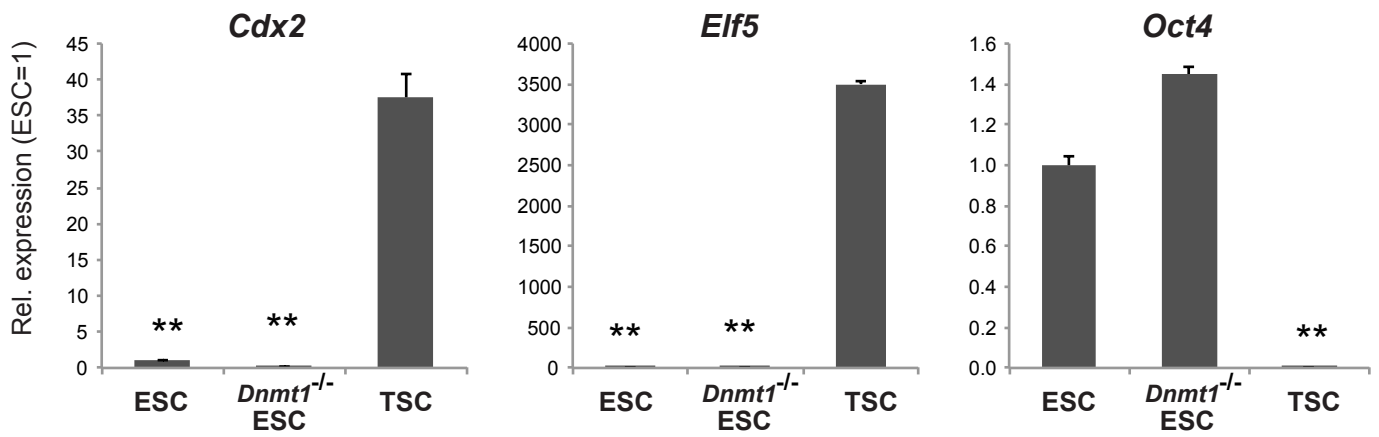**b**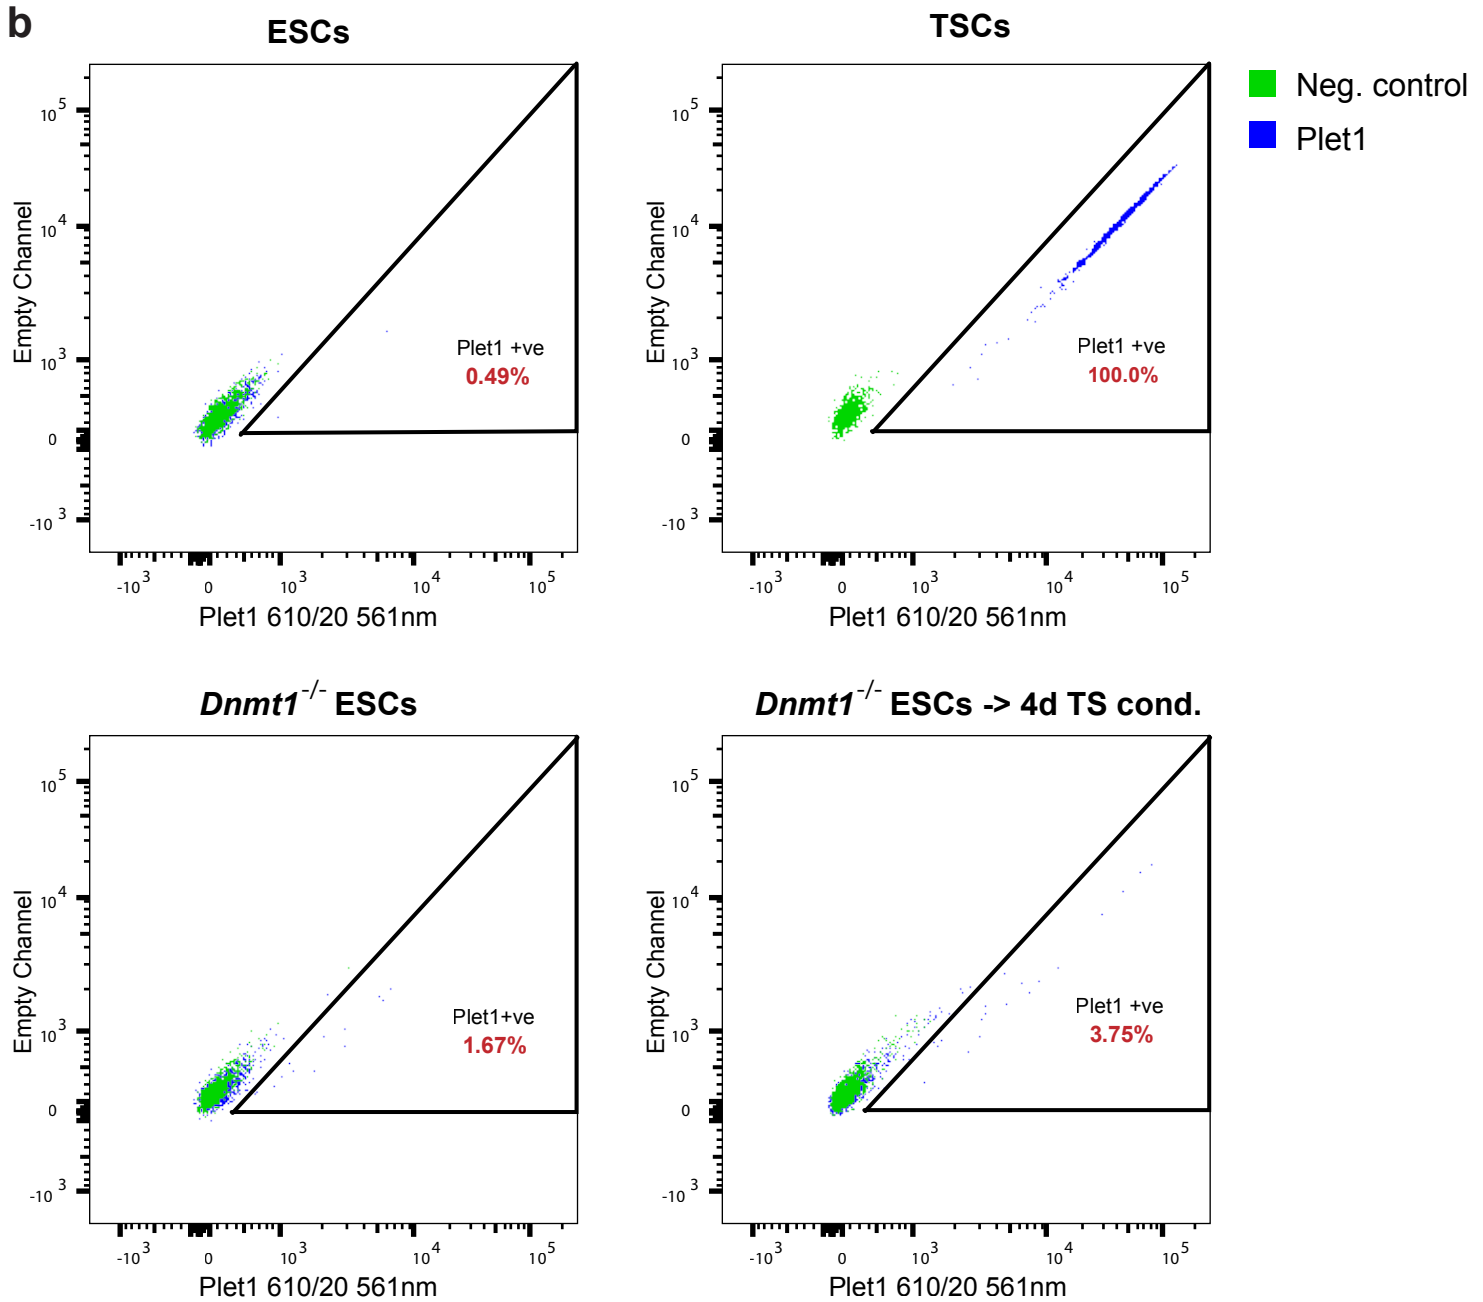

**Supplementary Figure S1. *Plet1* is a trophoblast-expressed cell surface protein.**

**(a)** Expression of lineage marker genes *Cdx2*, *Elf5* and *Oct4* (*Pou5f1*) in ESCs, *Dnmt1*<sup>-/-</sup> ESCs and TSCs as shown in Fig. 1c. Data are mean of three replicates displayed  $\pm$  S.E.M. (\*\*P < 0.005). **(b)** Flow cytometry analysis to identify *Plet1*-positive cells in *Dnmt1*<sup>-/-</sup> ESCs grown in ESC conditions or after 4 days of culture in TSC conditions. Wild-type ESCs and TSCs were used as control. The triangles demarcate the gating for *Plet1*-positive cells (blue pixels) against cell line-specific negative controls (green pixels); the percentage of *Plet1*-positive cells within the entire cell population is displayed for each group. For each sample, a total of 20,000 cells were analysed. As shown in Fig. 1e, TSCs are homogeneously positive for *Plet1* whereas ESCs are negative. Consistent with the RT-qPCR data (Fig. 1c), there is only a marginal increase in *Plet1*-positive cells in *Dnmt1*<sup>-/-</sup> ESCs; however, this fraction increases as cells undergo trans-differentiation towards trophoblast-like cells upon culture in TSC conditions, confirming again that the *Plet1* mRNA amounts determined by RT-qPCR (Fig. 2b) and the *Plet1* surface protein levels are closely correlated.

a

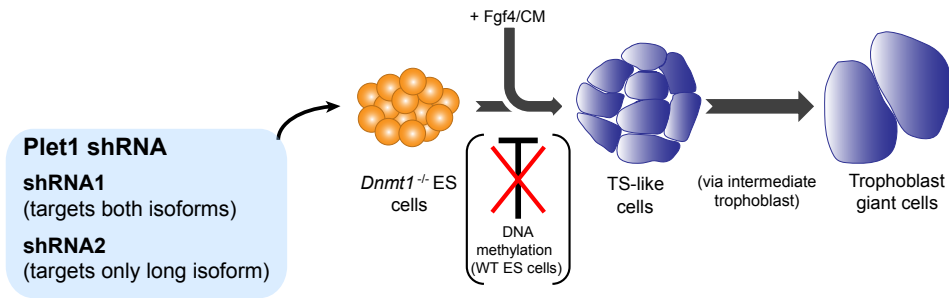

b

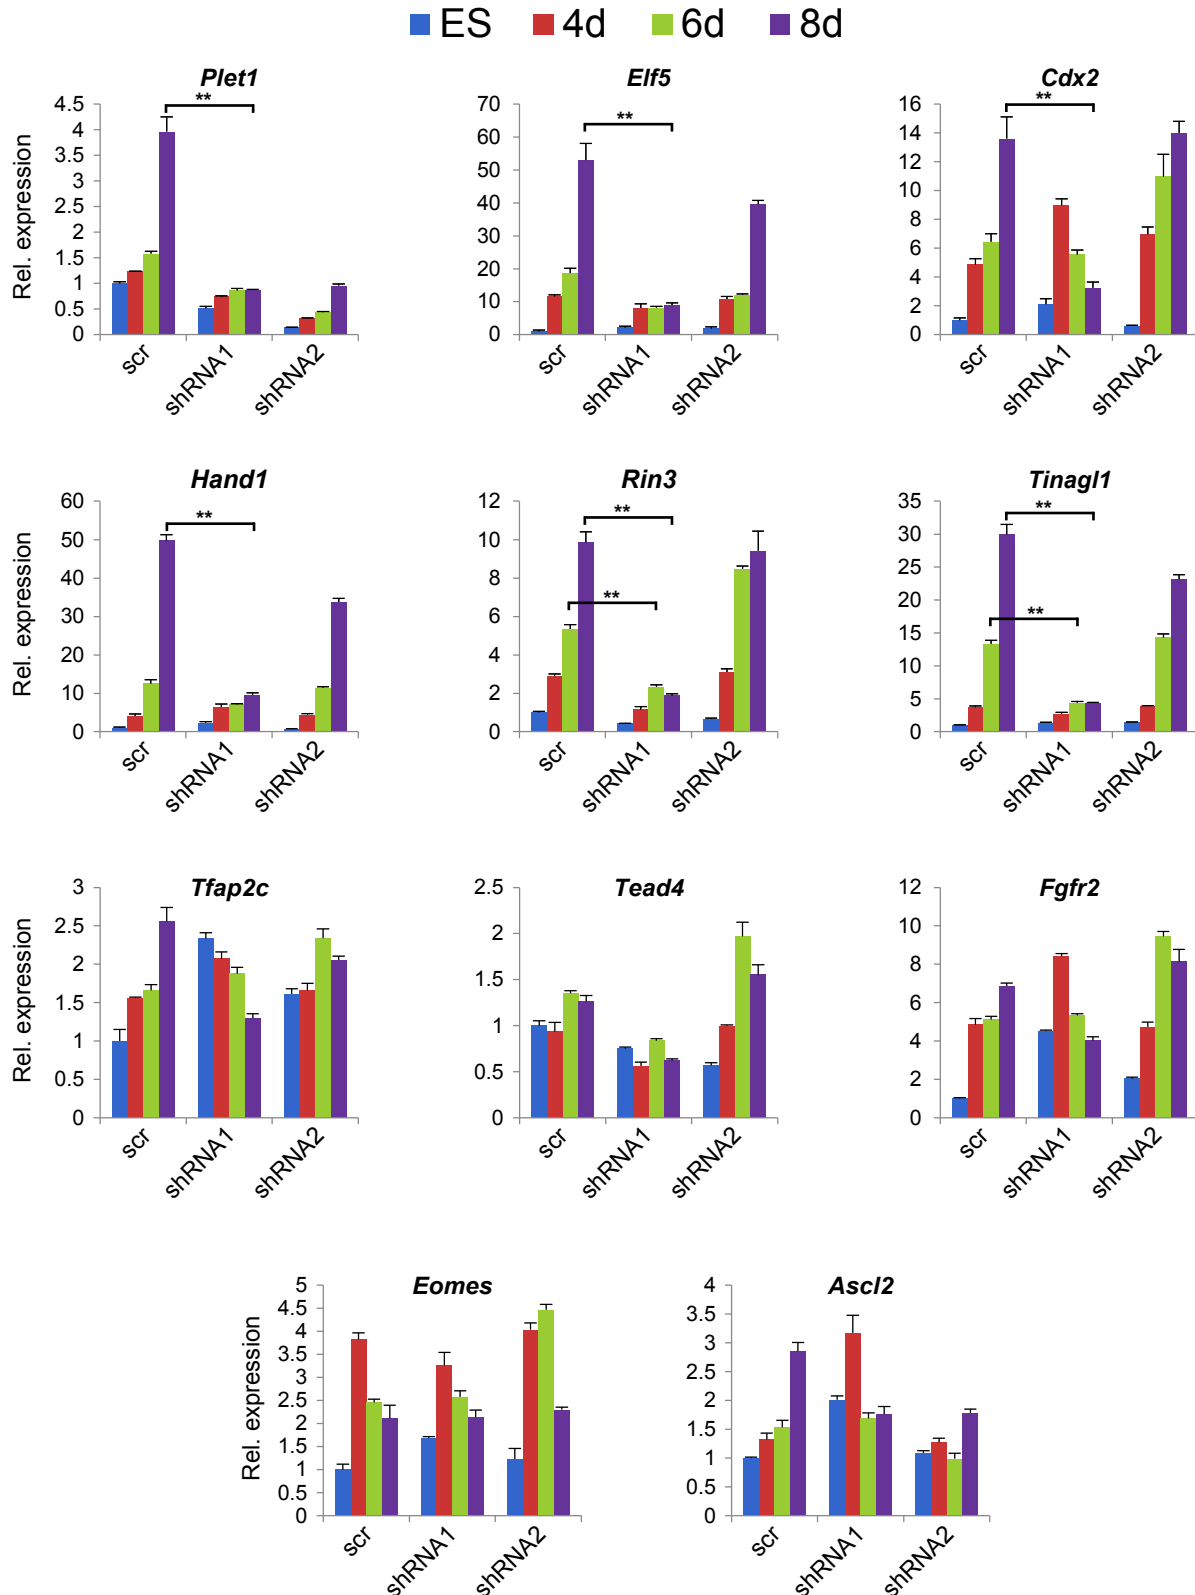

**Supplementary Figure S2. *Plet1* is necessary to induce trophoblast trans-differentiation in ESCs.** (a) *Dnmt1*<sup>-/-</sup> ESCs readily trans-differentiate into trophoblast cell types on transfer into TSC culture conditions (+Fgf/CM). (b) *Dnmt1*<sup>-/-</sup> ESCs were transfected with *Plet1* isoform-specific knockdown constructs: scrambled (scr), targeting both isoforms (shRNA1), or specific to the longer GPI-anchored isoform (shRNA2). *Dnmt1*<sup>-/-</sup> ESC clones with stable *Plet1* knockdown were established in ESC media (+Lif), and then induced to trans-differentiate into trophoblast by culture in TSC media alongside untransfected *Dnmt1*<sup>-/-</sup> ESCs (s/s). shRNA1-mediated *Plet1* knockdown prevents up-regulation of trophoblast markers, notably *Elf5*, *Cdx2* and *Hand1*, as well as *Rin3* and *Tinagl1* that were previously identified as trophoblast lineage signature genes<sup>9</sup>, suggesting that *Plet1* is required for trophoblast trans-differentiation from ESCs. Data are mean of three replicates ± S.E.M., and representative of two experiments.

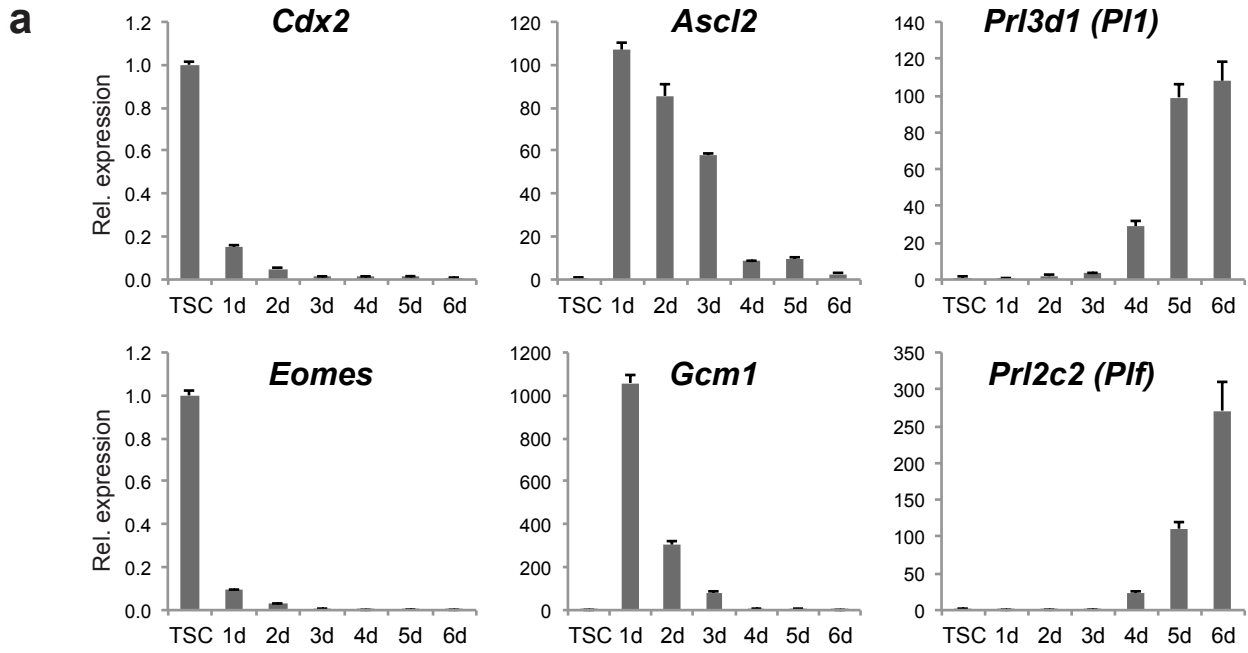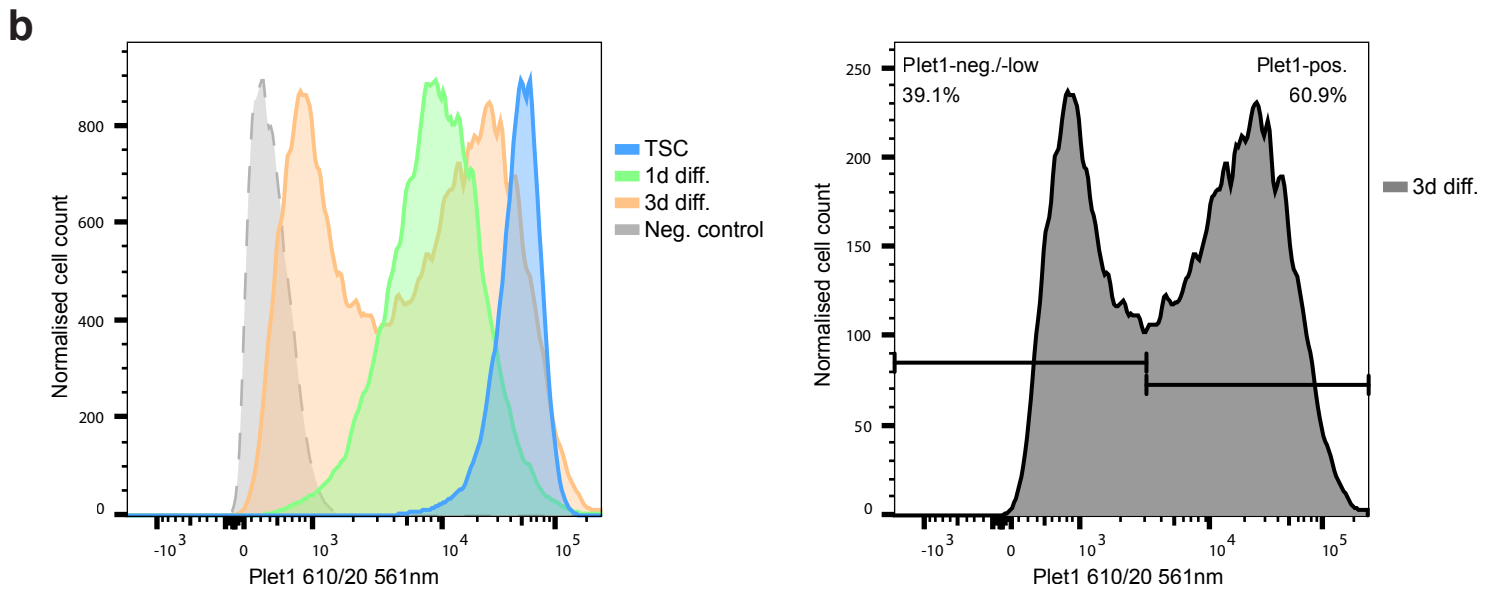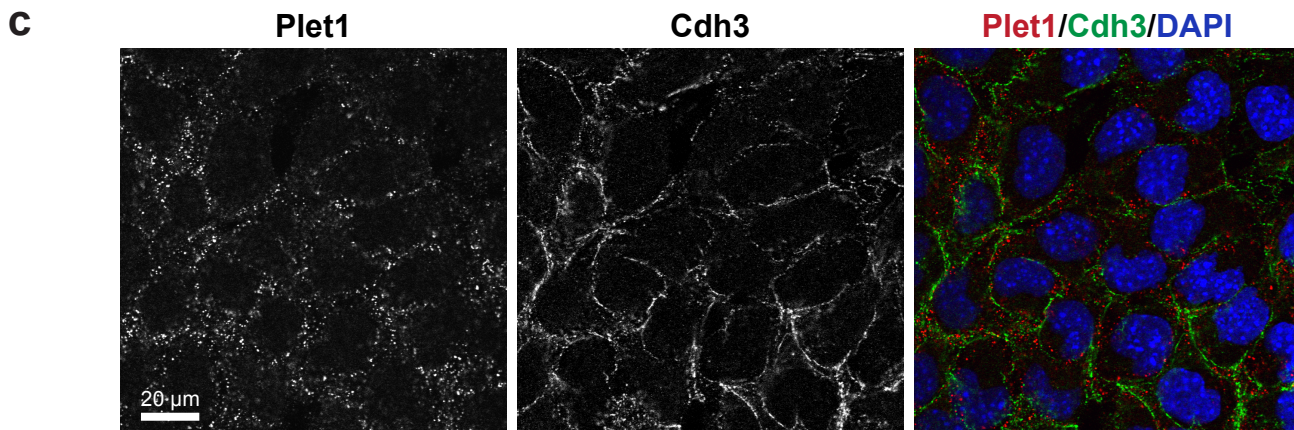

**Supplementary Figure S3. Plet1 regulation with trophoblast differentiation.**

**(a)** Relative expression levels of stem cell and differentiation marker genes during the 7-day time course of TSC differentiation as shown in Fig. 3c. Data represent the mean of six biological replicates  $\pm$  S.E.M. **(b)** Flow cytometry analysis for Plet1 during TSC differentiation. For each sample, a total of 20,000 cells were analysed that are displayed as histogram of staining intensity (x-axis). Surface protein levels recapitulate the down-regulation of Plet1 observed on the mRNA level (Fig. 3c) between TSCs and  $\sim$ 1 day (20 hours)-differentiated TSCs. Upon further differentiation at day 3, the majority of cells re-acquire Plet1 similar to the results observed by RT-qPCR. Quantification of cell fractions that are either negative (or low) for Plet1 or positive for Plet1 at 3d of differentiation was carried out by appropriate gating as shown in the right-hand graph. **(c)** Confocal images of double-immunofluorescence staining for Plet1 and Cdh3 of TSCs with prior permeabilisation. Nuclear counterstain: DAPI.

**a**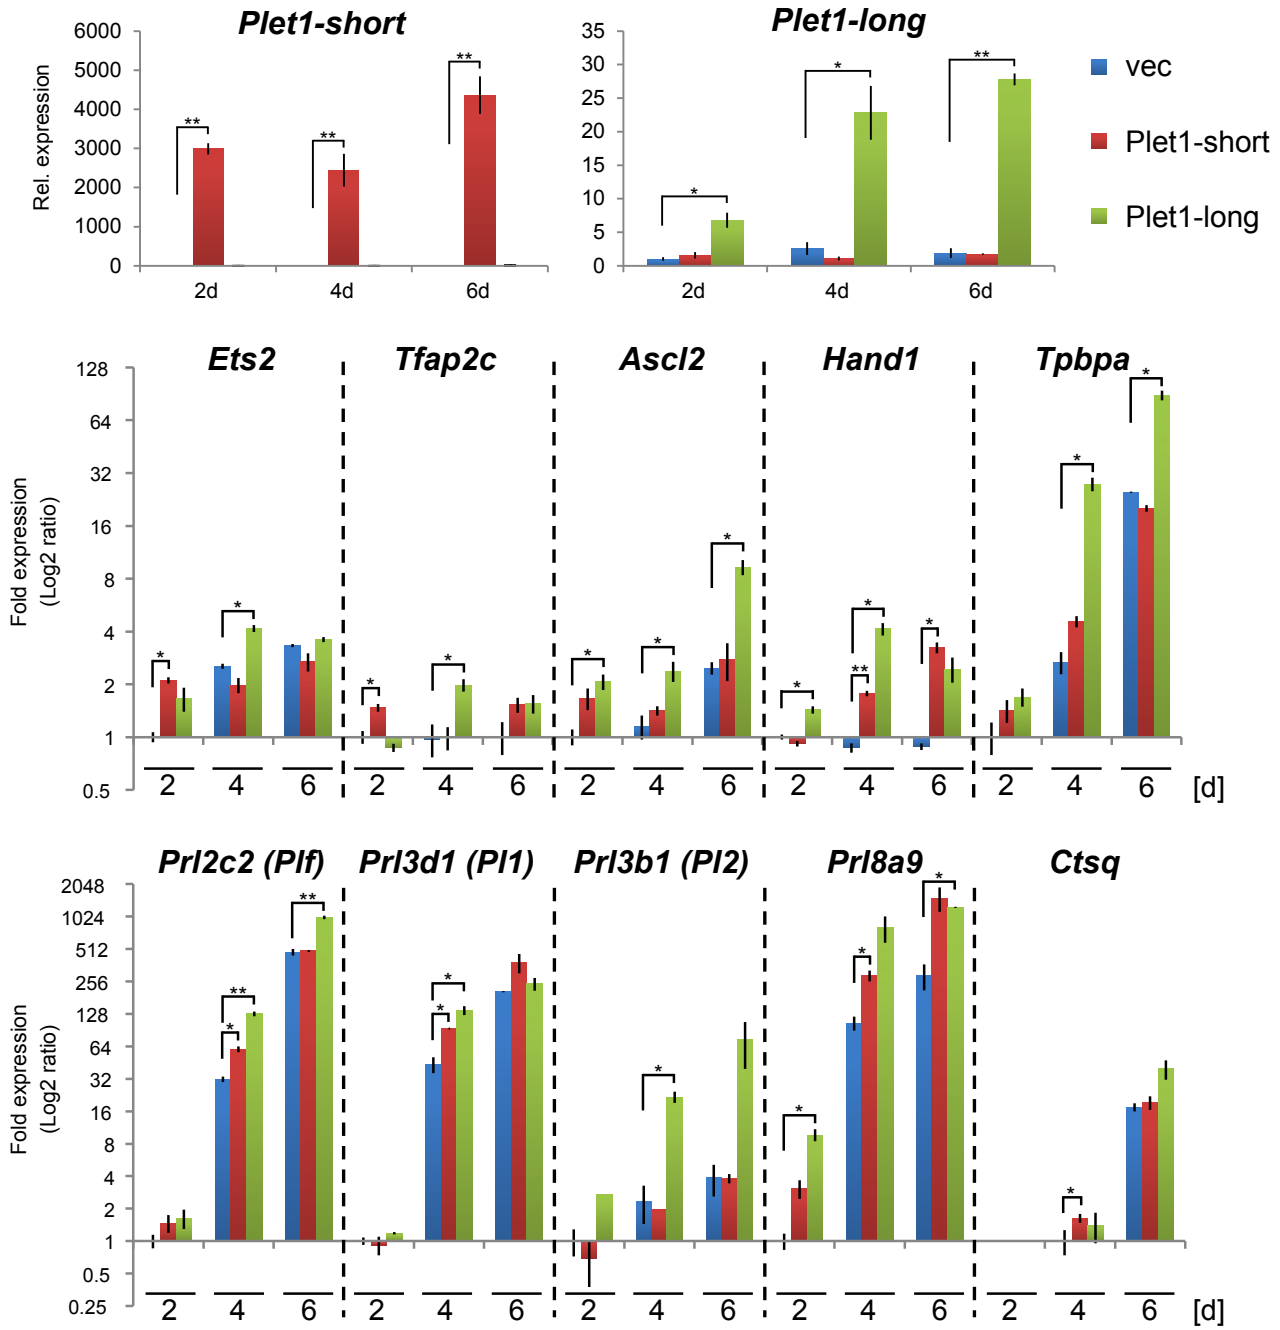**b**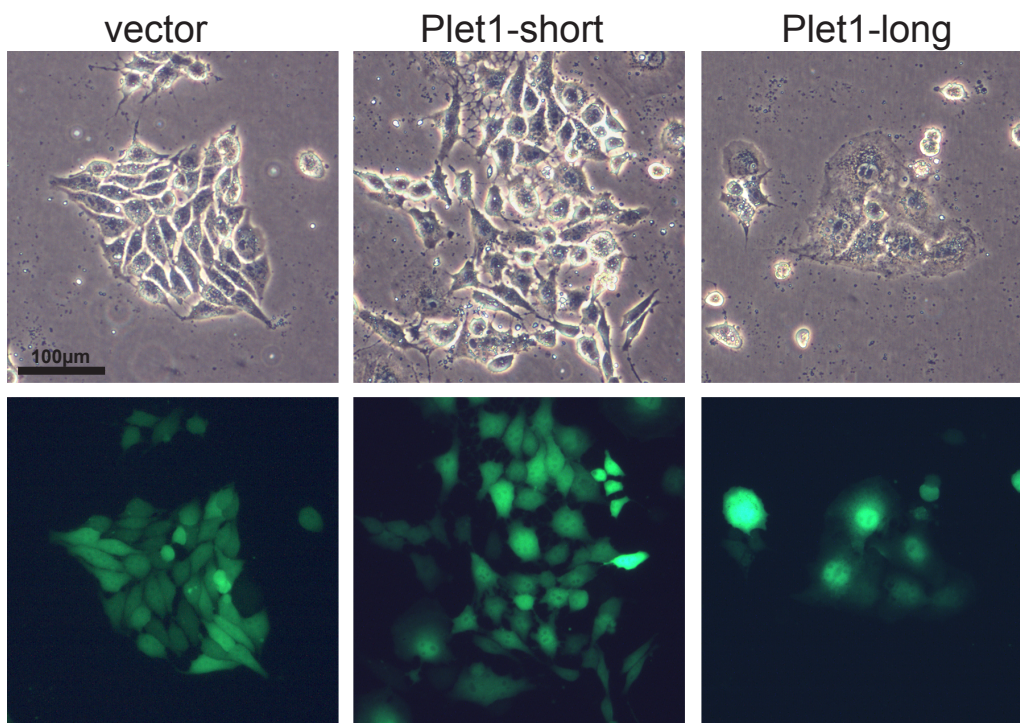



**Supplementary Figure S4. *Plet1* overexpression promotes differentiation of TSCs.** (a) Effect of high-level over-expression of *Plet1* on TSC differentiation. Wild-type TSCs were transfected with either the short isoform (Plet1-short) or the longer GPI-anchored isoform (Plet1-long). Displayed is the effect of *Plet1* isoform expression (upper) on markers of intermediate trophoblast (middle), and more differentiated giant cell markers (lower). Higher over-expression levels were achieved in this experimental series in particular for Plet1-long (Plet1\_001) at 4 days, compare to Fig. 4c,d, resulting in more pronounced differentiation into the trophoblast giant cell lineage. Data are mean of three replicates  $\pm$  S.E.M. (\* $P < 0.05$ , \*\* $P < 0.005$ ). (b) Phase contrast (upper row) and fluorescent photomicrographs (lower row) of TSCs transfected with vector, Plet1-short or Plet1-long expression constructs. EGFP fluorescence is indicative of transfected cells as the vector contains an IRES-EGFP sequence. Note the more differentiated appearance of Plet1 over-expressing cells despite continued culture in TSC conditions, in particular for the Plet1-long isoform in which the vast majority of cells have differentiated into trophoblast giant cells obvious by their large cell and nuclear size. Photos were taken at identical exposure settings 4 days post-transfection.

**a**

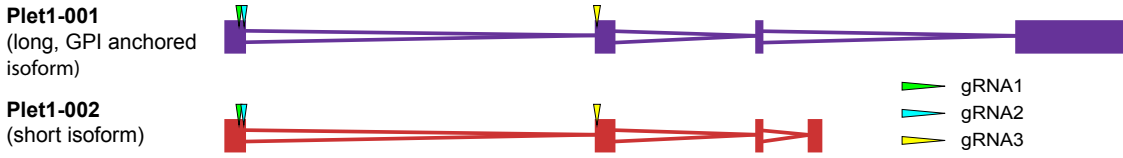

**b**

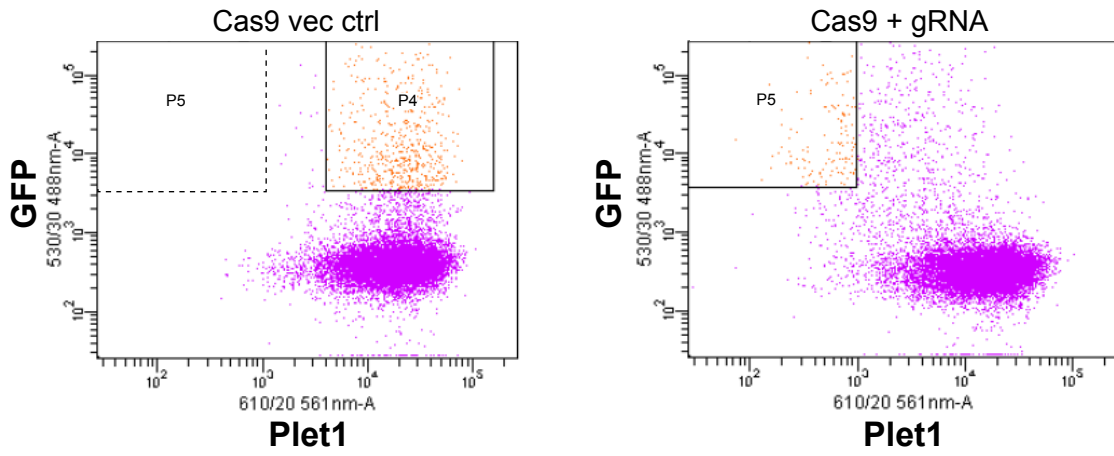

**c**

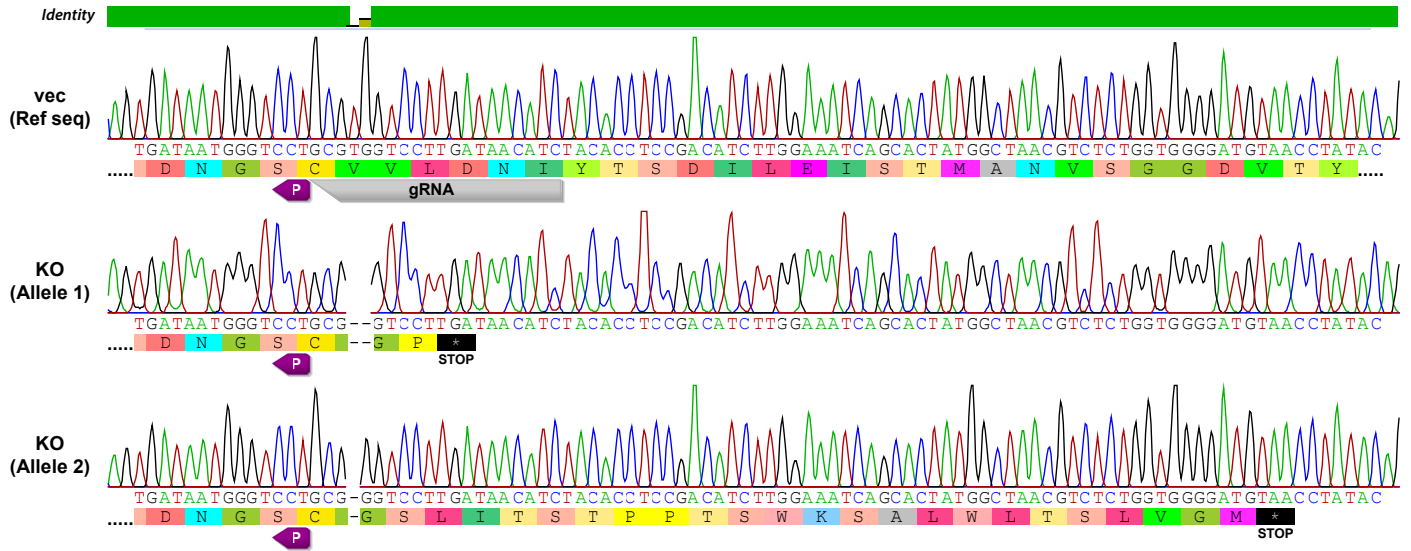

**d**

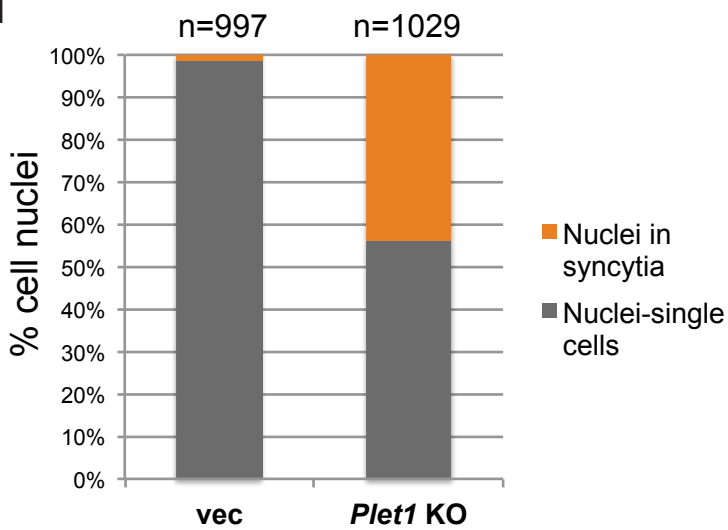

**Supplementary Figure S5. *Plet1* knockout strategy using CRISPR/Cas9.**

**(a)** Schematic diagram displaying the two isoforms of *Plet1* and the location of gRNA binding sites. All gRNA sequences were subjected to nucleotide BLAST searches and only those with high specificity were selected to limit the potential for off-target effects. **(b)** Wild-type TSCs were transfected with either empty vector Cas9.2A.EGFP construct (left; Cas9 vec ctrl) or *Plet1*-specific gRNA + Cas9.2A.EGFP construct (right; Cas9 + gRNA) and maintained in TSC media for two days. Cells were then stained for Plet1 and sorted by flow cytometry. For the vector control, the successfully transfected GFP/Plet1 positive population (P4) was collected; whereas in the Cas9 + gRNA samples the GFP-positive but Plet1 negative population (P5), not present in the vector control, was enriched for. Desired populations were single-cell sorted into 96-well plates facilitating the derivation of clonal cell lines. **(c)** Schematic diagram (generated using Geneious sequence analysis software) showing sequence traces for Cas9 vector control and both alleles of a representative *Plet1* KO clone. Displayed is the target locus for gRNA1 (in exon 1 of *Plet1*). Note, indel mutations on both alleles cause frame-shift mutation and a premature stop codon (STOP). P = protospacer adjacent motif (PAM); gRNA = guide RNA. **(d)** Quantification of cell nuclei that appear as single cells or in syncytia in vector control (vec) and *Plet1*<sup>-/-</sup> TSCs after 6 days of differentiation. Quantification was performed on 3 independent clones each; the total number of nuclei counted is given.

**Supplementary Table S1**

| <b>Primer name</b> | <b>Sequence (5'-3')</b>       |
|--------------------|-------------------------------|
| Ascl2_F            | AGCCCGATGGAGCAGGAG            |
| Ascl2_R            | CCGAGCAGAGGTCAGTCAGC          |
| Cdh1_F             | AGTTTACCCAGCCGGTCTTT          |
| Cdh1_R             | CCGGTGTCCCTATTGACAGT          |
| Cdx2_F             | AGTGAGCTGGCTGCCACACT          |
| Cdx2_R             | GCTGCTGCTGCTTCTTCTTGA         |
| Ctsq_F             | AATTGGCTATGGTTATGTGGGA        |
| Ctsq_R             | TCACACAGTAGGGTATTGGG          |
| D930020E02(SynB)_F | TCCGGAAAGGGACCTGCCCA          |
| D930020E02(SynB)_R | CAGCAGTAGTGCGGGGTGCC          |
| Dynein_F           | GACCTCAGGCTCAGACGAAGAC        |
| Dynein_R           | AAGACGCTCATGGCATCACA          |
| Elf5_F             | ATTGCTCGCAAGGTACTCC           |
| Elf5_R             | GGATGCCACAGTTCTCTTCAGG        |
| Eomes_F            | TCGCTGTGACGGCCTACCAA          |
| Eomes_R            | AGGGGAATCCGTGGGAGATGGA        |
| Esrrb_F            | AGTACAAGCGACGGCTGG            |
| Esrrb_R            | CCTAGTAGATTTCGAGACGATCTTAGTCA |
| Ets2_F             | GACCAAGTGGCCCCTGTCGC          |
| Ets2_R             | GGCCCGTGGGCACTTCTTGG          |
| Fgfr2_F            | TGCAGCTAGGACGGTAGACA          |
| Fgfr2_R            | GTCCAGTACGGTGCTCTCTG          |
| Gapdh_F            | ACATCTCACTCAAGATTGTCAGCA      |
| Gapdh_R            | ATGGCATGGACTGTGGTCAT          |
| Gata3_F            | AGGCAACCACGTCCCGTCCT          |
| Gata3_R            | CGGTGTGGTGGCTGCTCAGG          |
| Gcm1_F             | ACCCCTGAAGCTTATTCCT           |
| Gcm1_R             | TCGCCTTTGGACTGGAAA            |
| Gm52-(SynA)_F      | CCTCACCTCCCAGGCCCTC           |
| Gm52-(SynA)_R      | GGCAGGGAGTTTGCCACGA           |
| Hand1_F            | GAACTCAAAAAGACGGATGGTGG       |
| Hand1_R            | CGCCCAGACTTGCTGAGG            |
| Hprt1_F            | GTCATGCCGACCCGCAGTCC          |
| Hprt1_R            | GGCCACAATGTGATGGCCTCC         |
| Id2_F              | ACTCGCATCCCACTATCGTC          |
| Id2_R              | AATTCAGATGCCTGCAAGGA          |
| Id3_F              | CAGCTGAGCTCACTCCGGAAC         |
| Id3_R              | CCAGAGTCCCAGGGTCCCAA          |
| Ly6e_F             | GATGTCTGCCACTTCCAACA          |
| Ly6e_R             | CATCAGGGAATGAACTTGCTC         |
| Ovol2_F            | AACTCCAGAGCTTCACGACG          |
| Ovol2_R            | GCATGTGCCGGTGGTAAACT          |
| Pcdh12_F           | GCTGCTTTTGCGGAACGGAA          |
| Pcdh12_R           | TTTGGCTGGAATTGGCCCT           |
| Pgk1_F             | CTGACTTTGGACAAGCTGGACG        |

|                    |                           |
|--------------------|---------------------------|
| Pgk1_R             | GCAGCCTTGATCCTTTGGTTG     |
| Plet1_F            | CACTATGGCTAACGTCTCTGG     |
| Plet1_R            | CTGTTCGTCCTCCTTCACTG      |
| Plet1-001_F        | GTCCTCATCGTCGTCAATC       |
| Plet1-001_R        | TCGTGTTTATGGTCTGGC        |
| Plet1-002_F        | CCGTGAAAATGGAACAAG        |
| Plet1-002_R        | CAGAGTTGACCAGAGTGAGTG     |
| Prl2c-(Plf)_F      | AACGCAGTCCGGAACGGGG       |
| Prl2c-(Plf)_R      | TGTCTAGGCAGCTGATCATGCCA   |
| Prl3b1-(Pl2)_F     | GCACTCGGGGAACAGCAGCC      |
| Prl3b1-(Pl2)_R     | ACTGCCAGCAACAGGAGTGCC     |
| Prl3d1/2/3-(Pl1)_F | TTATCTTGCCCGCAGATGTGT     |
| Prl3d1/2/3-(Pl1)_R | GGAGTATGGATGGAAGCAGTATGAC |
| Prl8a9_F           | AAGAGAAAACCTCCTGGAAGACC   |
| Prl8a9_R           | AACAATTTATAATGTTGCCCTGTG  |
| Rin3_F             | ATTGGTGCTGTGTGTCCACT      |
| Rin3_R             | GCCTTCCAGGTACAGTATAGCC    |
| Sdha_F             | TGGTGAGAACAAGAAGGCATCA    |
| Sdha_R             | CGCCTACAACCACAGCATCA      |
| Sox2_F             | GAGTGAAACTTTTGTCCGAGA     |
| Sox2_R             | GAAGCGTGACTTATCCTTCTTCAT  |
| Spry4_F            | TCCTCAAAGACCCCTAGAAGC     |
| Spry4_R            | CATGACTGAGCTGGGATTCA      |
| Tbp_F              | GAGCTCTGGAATTGTACCGC      |
| Tbp_R              | GTTGTCCGTGGCTCTCTTATTC    |
| Tead4_F            | TCTAATGCCTTCTTCCCTGTGA    |
| Tead4_R            | GAGCAGACCTTCGTAGAGCA      |
| Tfap2c_F           | GCCGGACGCCATGTTGTGGA      |
| Tfap2c_R           | ACCCCGGTGTGCGAGAGAGG      |
| Tfeb_F             | TCAGAAGCGAGAGCTAACAG      |
| Tfeb_R             | TGCGTCTTCTCTCAATTAGGT     |
| Tinagl1_F          | TGATTCCAACGACATCTACCA     |
| Tinagl1_R          | CTTCCATGAGTGCTTGAACAG     |
| Tpbpa_F            | ACTGGAGTGCCAGCACAGC       |
| Tpbpa_R            | GCAGTTCAGCATCCAACCTGCG    |
| Zic3_F             | ACACTGGCGAGAAACCCTTC      |
| Zic3_R             | ACCGTCTGTACAGCCTTC        |

| <b>Bisulphite sequencing primers</b> |                              |
|--------------------------------------|------------------------------|
| Plet1 bis -1293F                     | GGTAAAATTTGTTTAGTTTTAGGA     |
| Plet1 bis -783R                      | CCAATACACTCCATACTTACCTTA     |
| Plet1 bis -1270F                     | GAAGTTTTGGATTTAGTTATTAGTG    |
| Plet1 bis -803R                      | TTACCTTAAATTAATTCTCTATACATTC |
| Plet1 bis -417F                      | TGAGATAAAAAGGGTATTTAAGTTTG   |
| Plet1 bis -89R                       | CCTCCTAAAAACATTACCTTCTAAA    |
| Plet1 bis -395F                      | TTTGAGTTTTTGATAGAGGAAAGTA    |
| Plet1 bis -131R                      | ACCTAAATAAATCACCCAACCT       |
| Plet1 bis -41F                       | GTTTTAGAGTATATAAATAGGAGTTTGT |

|                |                                |
|----------------|--------------------------------|
| Plet1 bis 456R | CTTAACACAACCTTATATTACCAAAAT    |
| Plet1 bis -1F  | TATTATTGTTAGGTTTGTAAATTTAAATAG |
| Plet1 bis 420R | CTAAAACCTCAATTTACCCCA          |

| Plet1 CRISPR gRNAs |        |      |                           |                             |
|--------------------|--------|------|---------------------------|-----------------------------|
| Name               | Strand | Exon | target oligo (5'-3')      | complementary oligo (5'-3') |
| gRNA1              | -      | 1st  | CACCGATGTTATCAAGGACCACGC  | AAACGCGTGGTCCTTGATAACATC    |
| gRNA2              | +      | 1st  | CACCGACTATGGCTAACGTCTCTGG | AAACCCAGAGACGTTAGCCATAGTC   |
| gRNA3              | -      | 2nd  | CACCGACTGACTGAATCGTTCACG  | AAACCGTGAACGATTCAGTCAGTC    |
